# Supplementary material
Source: PubMed Central journal article supplement (PMC2567460)
Supplement: 0803022105_0803022105SI.pdf [file 0803022105_0803022105SI.pdf]

# Supporting Information

Mattila *et al.* 10.1073/pnas.0803022105

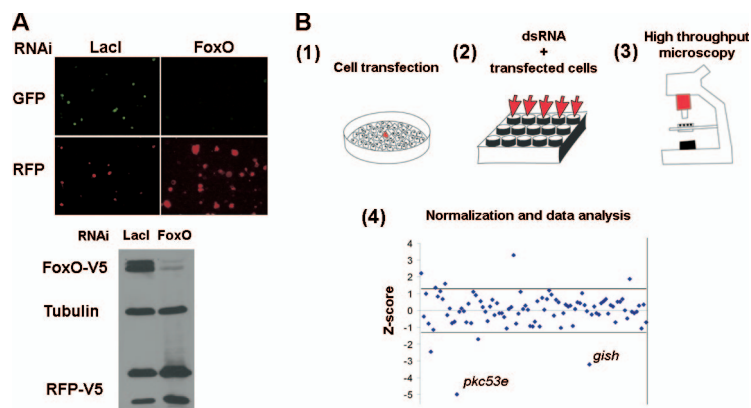

**Fig. S1.** Description of the primary screen. (A) The screening was based on the ability of dFoxO to drive the expression of the EGFP under a synthetic 4xFRE promoter. 4xFRE-EGFP reporter vector was transfected together with pMt-dFoxO expression vector and pMt-RFP control vector. Subsequently, the cells were treated with either *LacI* negative control or dFoxO dsRNA. Protein expression was induced by addition of  $\text{CuSO}_4$ . Knockdown of the overexpressed dFoxO protein abolished the EGFP expression. (B) Outline of the screening process (1). A population of S2 cells was simultaneously transiently transfected with the 4xFRE-EGFP, pMt-dFoxO and pMt-RFP vectors (2). The next day the cells were collected and divided into a multiwell plate prealiquoted with the dsRNA library. After 24 h, the cells were induced with  $\text{CuSO}_4$  and cultured for further 48 h. Cells were then transferred into an optical multiwell plate pretreated with concavalin A. After attachment the cells were washed and fixed (3). The plates were scanned by a high throughput microscope. Cells were identified by their RFP intensity and measured for both EGFP and RFP. Only cells having EGFP intensity above background level were selected for the analysis. From each cell the EGFP intensity was divided by its RFP intensity providing the relative dFoxO activity. We scanned 6,000 cells of each dsRNA treatment in triplicate (4). The averaged EGFP/RFP values were converted into Z scores. Each plate was treated independently. We chose genes having a Z score of 1.3 or higher in at least two out of the three replicates for further characterization. An example of one plate is illustrated showing the hits PKC53E and GISH. The average *P* values from the three replicates of all of the primary hits are provided in [Table S1](#).

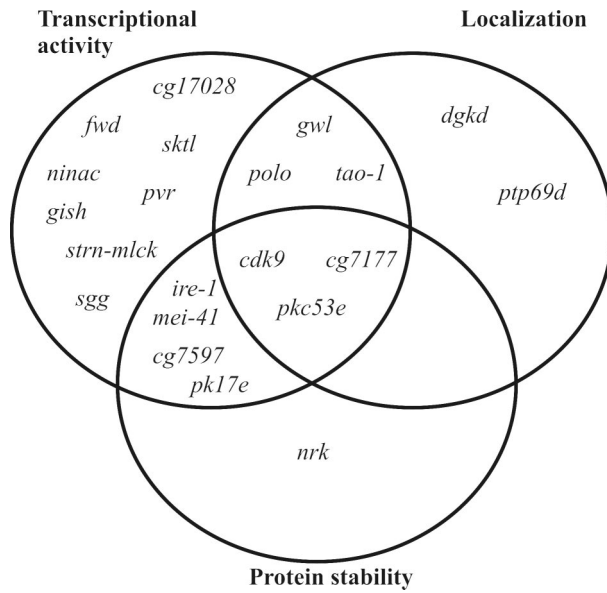

**Fig. S2.** The identified dFoxO regulators grouped by their regulatory mode of action. Eighteen proteins regulate dFoxO dependent transcription, eight regulate its localization, and eight its stability. Three proteins have effects in all three readouts.

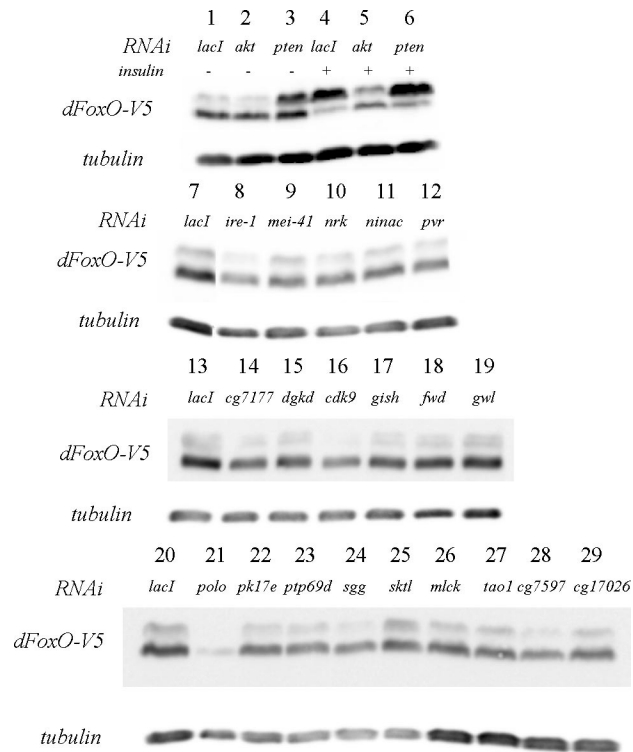

**Fig. S3.** dFoxO bandshifts upon the hit RNAi's. dFoxO bandshift was visualized on 8% SDS/PAGE gel for AKT and PTEN in the absence (lanes 1–3) or presence (lanes 4–6) of insulin. Lanes 7–29 dFOXO mobility after knockdown of RNAi hits from the screen.

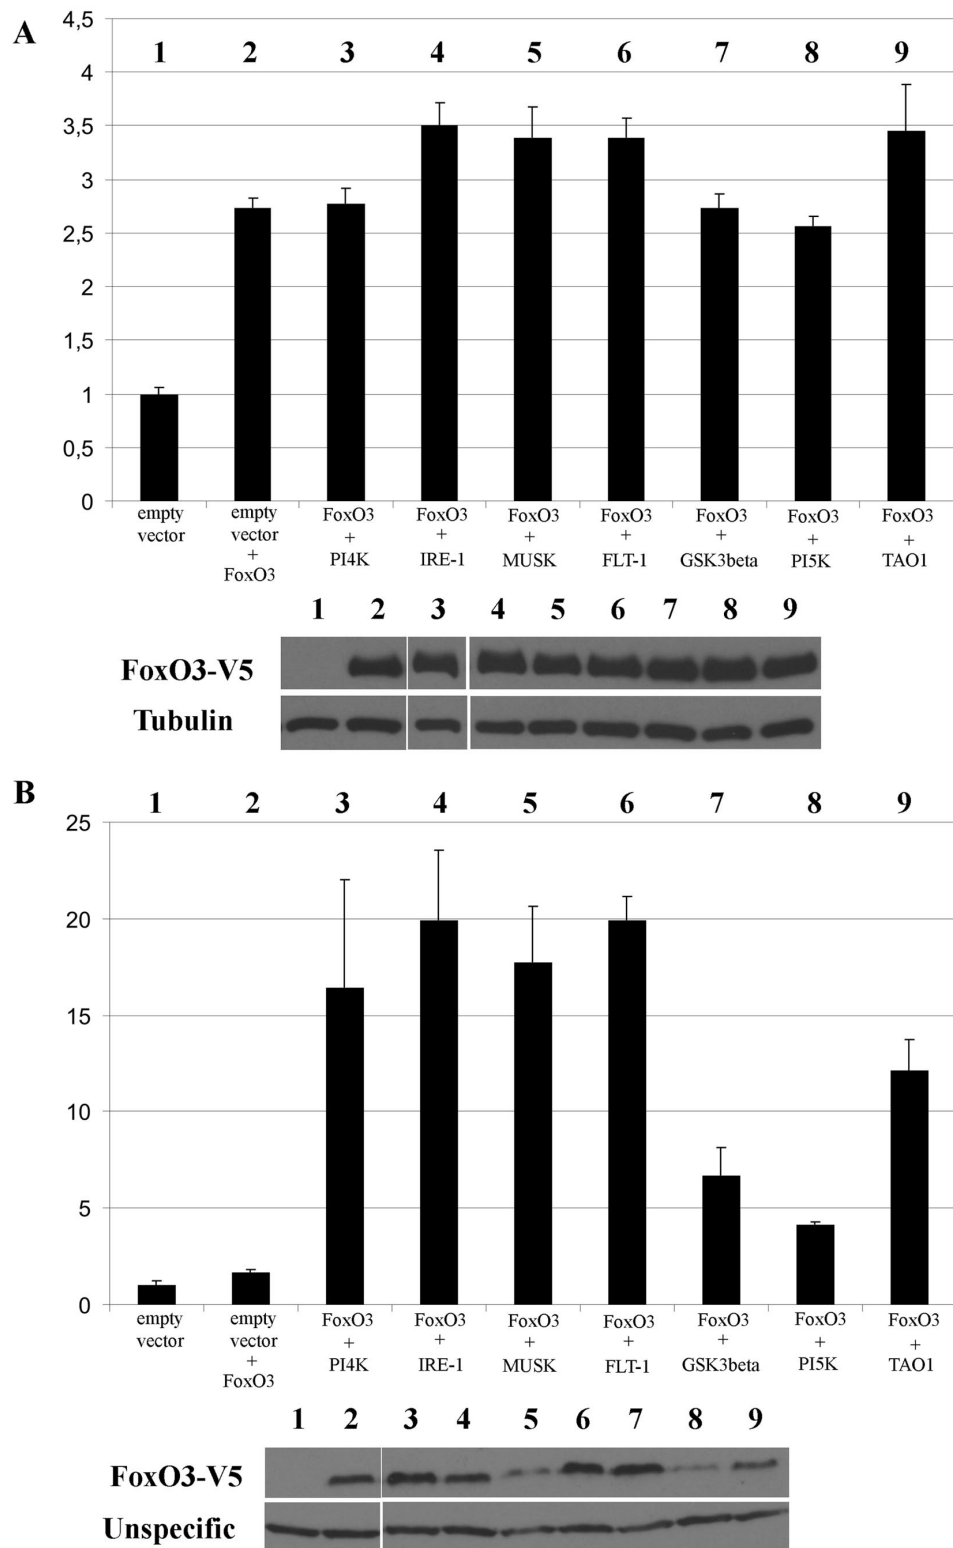

**Fig. S4.** FOXO3a transcriptional activity in HEK293 and HEPA1-6 cells upon overexpression of mammalian kinase orthologs. Eight mammalian orthologs of *Drosophila* proteins identified in the screen were coexpressed with FOXO3a and insulin receptor promoter luciferase reporter in HEK293 (A) and HEPA1-6 cells (B). Luciferase activity is measured with a human InR luciferase reporter.

Table S1. Primary screen hits

| Gene                                              | CG number | P        |
|---------------------------------------------------|-----------|----------|
| <i>akt</i>                                        | 4006      | 0.08     |
| <i>basket (bsk)</i>                               | 5680      | 0.1      |
| <i>adenylyl cyclase 78c (ac78c)</i>               | 10564     | 0.07     |
| <i>cg17026</i>                                    | 17026     | 0.05     |
| <i>cg7177</i>                                     | 7177      | 0.1      |
| <i>cg7597</i>                                     | 7597      | 0.03     |
| <i>cyclin dependent kinase 9 (cdk9)</i>           | 5179      | 0.02     |
| <i>darkener of apricot (doa)</i>                  | 33553     | 0.1      |
| <i>diacylglycerol kinase d (dgkd)</i>             | 34384     | 0.08     |
| <i>four wheel drive (fwd)</i>                     | 7004      | 0.04     |
| <i>gilgamesh (gish)</i>                           | 6963      | 0.0008   |
| <i>greatwall (gwl)</i>                            | 7719      | 0.05     |
| <i>guanylyl cyclase 55b (gc55b)</i>               | 33958     | 0.15     |
| <i>guanylyl cyclase at 76c (gc76c)</i>            | 8742      | 0.1      |
| <i>guanylyl cyclase at 88e (gc88e)</i>            | 4154      | 0.1      |
| <i>hipk</i>                                       | 17090     | 0.2      |
| <i>hippo</i>                                      | 11228     | 0.02     |
| <i>ia2</i>                                        | 31795     | 0.07     |
| <i>ire-1</i>                                      | 4583      | 0.08     |
| <i>meiotic 41 (mei-41)</i>                        | 4252      | 0.006    |
| <i>minibrain (mnb)</i>                            | 7826      | 0.03     |
| <i>myotubularin (mtm)</i>                         | 9115      | 0.006    |
| <i>neurospecific receptor kinase (nrk)</i>        | 4007      | 0.09     |
| <i>Ninac</i>                                      | 5125      | 0.08     |
| <i>pdgf- and vdgf-receptor related (pvr)</i>      | 8222      | 0.000001 |
| <i>pdk1</i>                                       | 1210      | 0.001    |
| <i>pkc 53e</i>                                    | 6622      | 0.0006   |
| <i>polo</i>                                       | 12306     | 0.01     |
| <i>protein kinase-like 17e (pk17e)</i>            | 7001      | 0.07     |
| <i>protein phosphatase 19c (pp19c)</i>            | 32505     | 0.08     |
| <i>protein tyrosine phosphatase 69d (ptp69d)</i>  | 10975     | 0.07     |
| <i>pten</i>                                       | 5671      | 0.002    |
| <i>shaggy (sgg)</i>                               | 2621      | 0.02     |
| <i>skittles (sktl)</i>                            | 9985      | 0.2      |
| <i>snf1a/amp-activated protein kinase (snf1a)</i> | 3051      | 0.002    |
| <i>stretchin-mlck (strn-mlck)</i>                 | 18255     | 0.2      |
| <i>tao-1</i>                                      | 14217     | 0.03     |
| <i>target of rapamycin (tor)</i>                  | 5092      | 0.08     |

Table S2. Hits and their mammalian orthologs

| Hit                                              | CG number | Mammalian ortholog                                                  | Accession no. | Expression vector (ref.)           |
|--------------------------------------------------|-----------|---------------------------------------------------------------------|---------------|------------------------------------|
| <i>cg17026</i>                                   | 17026     | inositol(myo)-1(or 4)-monophosphatase 1 (IMPA)                      | NP_005527     |                                    |
| <i>cg7177</i>                                    | 7177      | —                                                                   | —             |                                    |
| <i>cg7597</i>                                    | 7597      | Cell division cycle 2-like protein kinase 5                         | NP_003709     |                                    |
| <i>cyclin dependent kinase 9 (cdk9)</i>          | 5179      | cyclin-dependent kinase 9                                           | NP_001252     |                                    |
| <i>diacylglycerol kinase d (dgkd)</i>            | 34384     | diacylglycerol kinase $\delta$ 2                                    | NP_690618     | 3xFlag-CMV-7.1/hDGK $\delta$ 2 (1) |
| <i>four wheel drive (fwd)</i>                    | 7004      | Phosphatidylinositol 4-kinase $\beta$ (PI4K $\beta$ )               | NP_002642     | pcDNA3-HA-PI4K $\beta$ (2)         |
| <i>gilgamesh (gish)</i>                          | 6963      | casein kinase 1, gamma 3                                            | NP_004375     |                                    |
| <i>greatwall (gwl)</i>                           | 7719      | microtubule associated serine/threonine kinase-like                 | NP_116233     |                                    |
| <i>ire-1</i>                                     | 4583      | Inositol-requiring protein 1 (IRE-1)                                | NP_001424     | pCAG-hIRE1 (3)                     |
| <i>meiotic 41 (mei-41)</i>                       | 4252      | Serine/threonine-protein kinase ATR                                 | NP_001175     |                                    |
| <i>neurospecific receptor kinase (nrk)</i>       | 4007      | Muscle & skeletal receptor tyrosine protein kinase precursor (MUSK) | NP_005583     | pcDNA3.1 Myc-MUSK (4)              |
| <i>Ninac</i>                                     | 5125      | Myosin-IIIB                                                         | NP_001077084  |                                    |
| <i>pdgf- and vdgf-receptor related (pvr)</i>     | 8222      | Vascular endothelial growth factor receptor 1 precursor (FLT-1)     | NP_002010     | pcDNA hFLT-1 (5)                   |
| <i>pkc 53e</i>                                   | 6622      | Protein kinase C alpha                                              | NP_002728     |                                    |
| <i>polo</i>                                      | 12306     | Serine/threonine-protein kinase PLK1                                | NP_005021     |                                    |
| <i>protein kinase-like 17e (pk17e)</i>           | 7001      | —                                                                   | —             |                                    |
| <i>protein tyrosine phosphatase 69d (ptp69d)</i> | 10975     | —                                                                   | —             |                                    |
| <i>shaggy (sgg)</i>                              | 2621      | Glycogen synthase kinase-3 $\beta$                                  | NP_002084     | pcDNA ratGsk3 $\beta$ (6)          |
| <i>skittles (sktl)</i>                           | 9985      | phosphatidylinositol-4-phosphate 5-kinase, type I, alpha            | NP_003548     | pcDNA3-myc-mousePIP5K $\alpha$ (7) |
| <i>stretchin-mlck (strn-mlck)</i>                | 18255     | Myosin light chain kinase, smooth muscle (smMLCK)                   | NP_444253     |                                    |
| <i>tao-1</i>                                     | 14217     | Serine/threonine-protein kinase TAO1                                | NP_065842     | pCMV5-ratTAO1 (8)                  |

1. Sakane F, Imai S, Yamada K, Murakami T, Tsushima S, Kanoh H (2002) Alternative splicing of the human diacylglycerol kinase delta gene generates two isoforms differing in their expression patterns and in regulatory functions. *J Biol Chem* 277:43519–43526.
2. Godi A, Pertile P, Meyers R, Marra P, Di TG, Lurisci C, Luini A, Corda D, De Matteis MA (1999) ARF mediates recruitment of PtdIns-4-OH kinase-beta and stimulates synthesis of PtdIns(4,5)P2 on the Golgi complex. *Nat Cell Biol* 1:280–287.
3. Imagawa Y, Hosoda A, Sasaka S, Tsuru A, Kohno K (2008) RNase domains determine the functional difference between IRE1alpha and IRE1beta. *FEBS Lett* 582:656–660.
4. Smith MJ, Hardy WR, Murphy JM, Jones N, Pawson T (2006) Screening for PTB domain binding partners and ligand specificity using proteome-derived NPXY peptide arrays. *Mol Cell Biol* 26:8461–8474.
5. Fragoso R, Pereira T, Wu Y, Zhu Z, Cabecadas J, Dias S (2006) VEGFR-1 (FLT-1) activation modulates acute lymphoblastic leukemia localization and survival within the bone marrow, determining the onset of extramedullary disease. *Blood* 107:1608–1616.
6. Eng CH, Huckaba TM, Gundersen GG (2006) The formin mDia regulates GSK3beta through novel PKCs to promote microtubule stabilization but not MTOC reorientation in migrating fibroblasts. *Mol Biol Cell* 17:5004–5016.
7. Yamazaki M, Miyazaki H, Watanabe H, Sasaki T, Maehama T, Frohman MA, Kanaho Y (2002) Phosphatidylinositol 4-phosphate 5-kinase is essential for ROCK-mediated neurite remodeling. *J Biol Chem* 277:17226–17230.
8. Hutchison M, Berman KS, Cobb MH (1998) Isolation of TAO1, a protein kinase that activates MEKs in stress-activated protein kinase cascades. *J Biol Chem* 273:28625–28632.
